# Supplementary material for: The Effect and Mechanism of Corilagin from Euryale Ferox Salisb Shell on LPS-Induced Inflammation in Raw264.7 Cells
Source: MDPI journal article supplement (doi:10.3390/foods12050979), 2023-02-25
Supplement: s1 [file s1]

# The effect and mechanism of Corilagin from *Euryale ferox* Salisb shell on LPS-induced inflammation in Raw264.7 cell

## Supplementary Materials

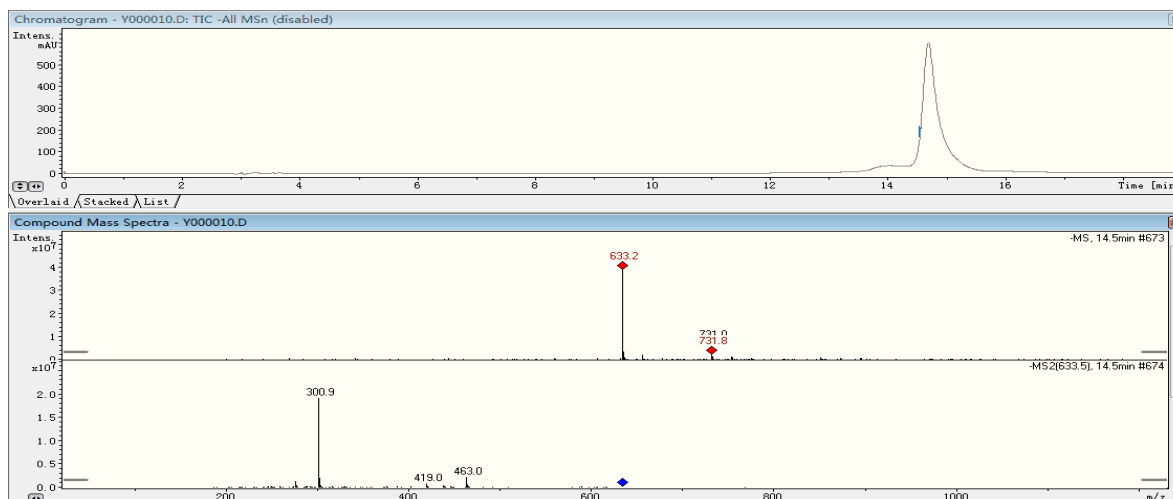

Figure S1. Mass spectra of corilagin.

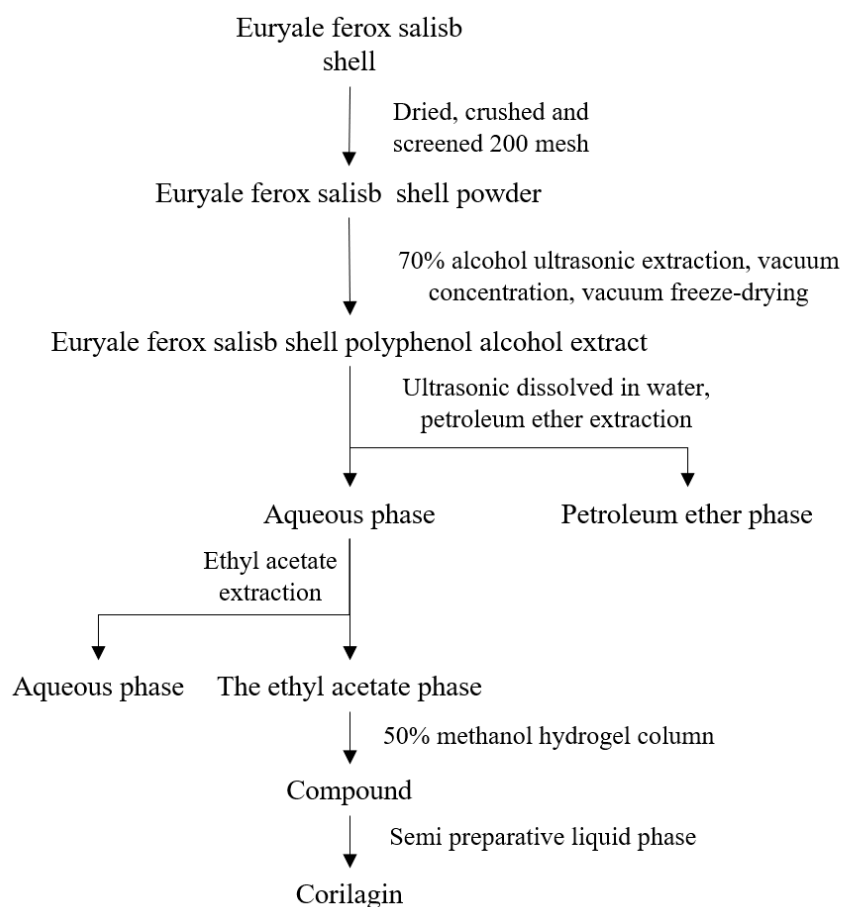

Figure S2. Corilagin extraction process.
